# Supplementary material for: Oxygen vacancy-containing hafnium-dioxide/polyetheretherketone composite with good photothermal performance and bioactivity for treatment of tumors and infection as well as the promotion of pro-osteogenesis
Source: Royal Society of Chemistry journal article supplement (doi:10.1039/d4tb02869d), 2025-01-01
Supplement: d4tb02869d1.pdf [file d4tb02869d1.pdf]

## Supplementary Information

### Oxygen vacancy hafnium-dioxide/polyetheretherketone composite with photothermal performance and bioactivity for treatment of tumor and infection as well as pro-osteogenesis

Yong Dai <sup>‡a</sup>, Zhe Li <sup>‡b</sup>, Xiaofeng Ji <sup>a</sup>, Peng Cheng <sup>a</sup>, Xingshi Yuan <sup>a</sup>, Kerong Wu <sup>a</sup>, Deqiang Wang <sup>c</sup>, Jie Wei <sup>c</sup>, Xifu Shang <sup>a,\*</sup>

a. Department of Orthopedics, The First Affiliated Hospital of USTC, Division of Life Sciences and Medicine, University of Science and Technology of China, Hefei, Anhui 230001, China

b. Department of Ultrasound, The First Affiliated Hospital of USTC, Division of Life Sciences and Medicine, University of Science and Technology of China, Hefei, Anhui 230036, China

c. School of Materials Science and Engineering, East China University of Science and Technology, Shanghai, 200237, China

## Contents

- Table S1** The mechanical properties of the samples.
- Figure S1** LCM images of PEEK (A,D), PHC (B,E) and PBHC (C,F).

**Table S1** The mechanical properties of the samples.

|                            | PEEK        | PHC         | PBHC        |
|----------------------------|-------------|-------------|-------------|
| Compressive strength (MPa) | 136.4± 3.7  | 192.5 ± 5.1 | 187.5 ± 6.4 |
| Bending strength (MPa)     | 117.8 ± 4.1 | 106.1 ± 4.6 | 102.1 ± 5.0 |
| Elastic modulus (GPa)      | 3.0± 0.4    | 5.8 ± 1.4   | 6.0 ± 1.2   |

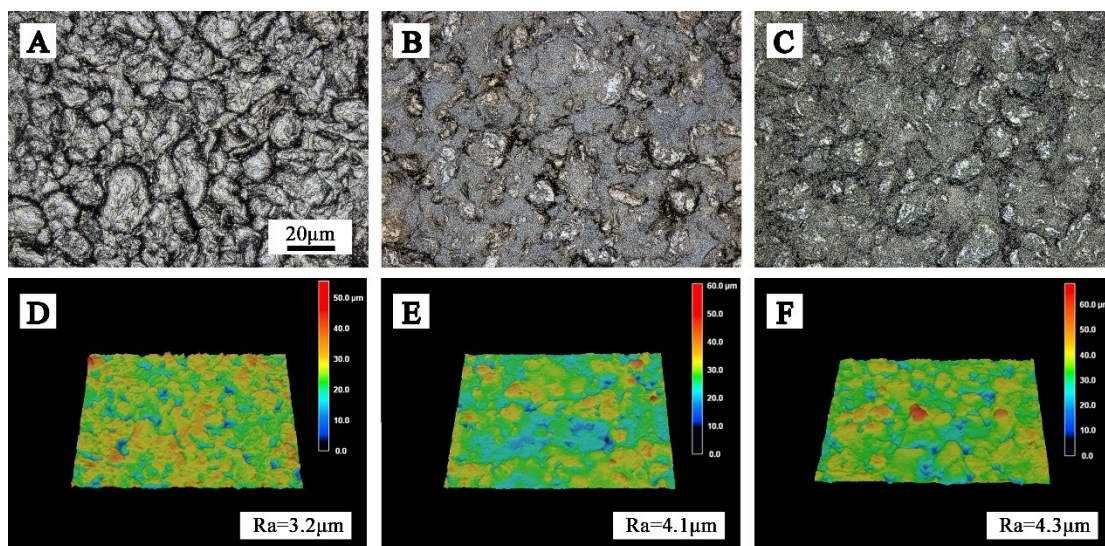

**Fig. S1** LCM images of PEEK (A,D), PHC (B,E) and PBHC (C,F).
